# Supplementary material for: Revealing the synergistic effect of Ni single atoms and adjacent 3d metal doped Ni nanoparticles in electrocatalytic CO2 reduction
Source: Royal Society of Chemistry journal article supplement (doi:10.1039/d4na00167b), 2024-01-01
Supplement: d4na00167b1.pdf [file d4na00167b1.pdf]

## Supporting information for:

### **Revealing the Synergistic Effect of Ni Single Atoms and Adjacent 3d metal Doped Ni Nanoparticles in Electrocatalytic CO<sub>2</sub> Reduction**

Yingjie Liu,<sup>a,†</sup> Zhaohui Wu,<sup>a,†</sup> Sha Bai,<sup>a</sup> Tianyang Shen,<sup>a</sup> Qian Li,<sup>a</sup> Guihao Liu,<sup>a</sup> Xiaoliang Sun,<sup>a</sup> Yihang Hu,<sup>a</sup> Ziheng Song,<sup>a</sup> Jinfeng Chu,<sup>a,\*</sup> and Yu-Fei Song<sup>a,b\*</sup>

<sup>a</sup>State Key Laboratory of Chemical Resource Engineering, Beijing University of Chemical Technology, Beijing 100029 P. R. China.

<sup>b</sup>Quzhou Institute for Innovation in Resource Chemical Engineering, Quzhou, Zhejiang Province, 324000 P. R. China.

<sup>†</sup>These authors contributed equally to this work.

## List of Contents:

### Experimental Section

Figure S1. XRD patterns of NiMAI-LDH.

Figure S2. XRD patterns of  $\text{Ni}_{1+\text{NPs}}\text{M}@\text{NCNTs}$ .

Figure S3. Raman spectra of  $\text{Ni}_{1+\text{NPs}}\text{M}@\text{NCNT}$ .

Figure S4. (a-f) SEM images of  $\text{Ni}_{1+\text{NPs}}\text{M}@\text{NCNT}$  (M=Mn, Fe, Co, Ni, Cu, Zn).

Figure S5. TEM images of (a)  $\text{Ni}_{1+\text{NPs}}\text{Mn}@\text{NCNT}$  and (b)  $\text{Ni}_{1+\text{NPs}}\text{Fe}@\text{NCNT}$ .

Figure S6. EDX elemental mapping image of N in the  $\text{Ni}_{1+\text{NPs}}\text{Cu}@\text{NCNT}$ .

Figure S7. (a) STEM image of  $\text{Ni}_{1+\text{NPs}}\text{Cu}@\text{NCNT}$  and (b) the corresponding STEM-EDX line scanning image.

Figure S8. EXAFS in k space of  $\text{Ni}_{1+\text{NPs}}@\text{NCNT}$ ,  $\text{Ni}_{1+\text{NPs}}\text{Cu}@\text{NCNT}$  and Ni foil.

Figure S9. Cu K-edge XANES spectra of  $\text{Ni}_{1+\text{NPs}}\text{Cu}@\text{NCNT}$  and Cu foil

Figure S10. XPS of  $\text{Ni}_{1+\text{NPs}}@\text{NCNT}$ ,  $\text{Ni}_{1+\text{NPs}}\text{Mn}@\text{NCNT}$ ,  $\text{Ni}_{1+\text{NPs}}\text{Fe}@\text{NCNT}$  and  $\text{Ni}_{1+\text{NPs}}\text{Cu}@\text{NCNT}$ .

Figure S11. (a) N 1s and (b) Ni 2p XPS spectra of  $\text{Ni}_{1+\text{NPs}}@\text{NCNT}$ ,  $\text{Ni}_{1+\text{NPs}}\text{Mn}@\text{NCNT}$ ,  $\text{Ni}_{1+\text{NPs}}\text{Fe}@\text{NCNT}$  and  $\text{Ni}_{1+\text{NPs}}\text{Cu}@\text{NCNT}$ .

Table S1. EXAFS fitting results of  $\text{Ni}_{1+\text{NPs}}\text{Cu}@\text{NCNT}$ ,  $\text{Ni}_{1+\text{NPs}}@\text{NCNT}$  and Ni foil.

Figure S12. (a-f) LSV curves of  $\text{Ni}_{1+\text{NPs}}\text{M}@\text{NCNT}$  under Ar (black) and  $\text{CO}_2$  (colored) atmosphere.

Figure S13. Characterization for the liquid product of  $\text{Ni}_{1+\text{NPs}}\text{M}@\text{NCNT}$  after the full-potential- $\text{CO}_2\text{RR}$  period by  $^1\text{H}$  nuclear magnetic resonance spectroscopy.

Figure S14.  $\text{CO}_2\text{RR}$  performance of  $\text{Ni}_{1+\text{NPs}}\text{M}@\text{NCNT}$ . (a)  $\text{FE}_{\text{CO}}$  of  $\text{Ni}_{1+\text{NPs}}\text{M}@\text{NCNT}$  (M=Mn, Fe, Co, Ni, Cu, Zn); (b) contour plots of  $\text{J}_{\text{CO}}$  under different potential.

Table S2.  $\text{FE}_{\text{CO}}$  of  $\text{Ni}_{1+\text{NPs}}\text{M}@\text{NCNT}$  under different potentials.

Figure S15. Typical cyclic voltammetry curves for (a)  $\text{Ni}_{1+\text{NPs}}@\text{NCNT}$ , (b)  $\text{Ni}_{1+\text{NPs}}\text{Mn}@\text{NCNT}$ , (c)  $\text{Ni}_{1+\text{NPs}}\text{Fe}@\text{NCNT}$  and (d)  $\text{Ni}_{1+\text{NPs}}\text{Cu}@\text{NCNT}$  under different scan rates.

Figure S16. (a) XRD patterns of  $\text{Ni}_{1+\text{NPs}}\text{Cu}@\text{NCNT}$  before (black) and after (red)  $\text{CO}_2\text{RR}$ ; (b) TEM image of the  $\text{Ni}_{1+\text{NPs}}\text{Cu}@\text{NCNT}$  after  $\text{CO}_2\text{RR}$ .

Figure S17. DFT models for  $\text{Ni}_{1+\text{NPs}}@\text{NCNT}$  and  $\text{Ni}_{1+\text{NPs}}\text{Cu}@\text{NCNT}$ .

Figure S18.  $\text{CO}_2\text{RR}$  performance of  $\text{Ni}_{\text{NPs}}@\text{NCNT}$ . (a) current density and (b)  $\text{FE}_{\text{CO}}$  and  $\text{FE}_{\text{H}_2}$  under different potentials.

Figure S19. (a) Schematic illustration and (b) photograph of the flow cells.

Figure S20. (a) TCD1 Chromatogram of CO; and (b) TCD2 Chromatogram of H<sub>2</sub>.

Table S3. Comparison of CO<sub>2</sub>RR performance displayed by our catalyst and other reported works.

## Experimental Section

**Materials:**  $\text{NiCl}_2 \cdot 6\text{H}_2\text{O}$ ,  $\text{AlCl}_3 \cdot 6\text{H}_2\text{O}$ ,  $\text{FeCl}_3 \cdot 6\text{H}_2\text{O}$ ,  $\text{MnCl}_2 \cdot 4\text{H}_2\text{O}$ ,  $\text{CoCl}_2 \cdot 6\text{H}_2\text{O}$ ,  $\text{CuCl}_2 \cdot 2\text{H}_2\text{O}$ ,  $\text{ZnCl}_2$ ,  $\text{NaOH}$ ,  $\text{KHCO}_3$ , melamine,  $\text{HCl}$  were purchased from Sigma-Aldrich Co. and were used without any further purification. Deionized water was used in all the experimental processes. Nafion 211 membrane was purchased from Dupont. Carbon dioxide (99.999%) was purchased at Beijing Beiwen Gas Comp.

**Synthesis of NiMAI-LDH (X=Ni, Mn, Fe, Co, Cu, Zn):** 47.5mmol  $\text{NiCl}_2 \cdot 6\text{H}_2\text{O}$ , 25mmol  $\text{AlCl}_3 \cdot 6\text{H}_2\text{O}$  and 2.5mmol chloride of metal X were dispersed in 35 mL deionized water as solution A.  $\text{NaOH}$  and  $\text{Na}_2\text{CO}_3$  were dispersed in another 50mL deionized water and added dropwise into solution A under  $80^\circ\text{C}$ . The obtained mixture was then stirred under  $80^\circ\text{C}$  for 12h and washed by deionized water till  $\text{pH}=7$ . The drying process finally gave rise to NiMAI-LDH.

**Synthesis of  $\text{Ni}_{1+\text{NPs}}\text{M}@\text{NCNT}$  (M= Ni, Mn, Fe, Co, Cu, Zn):** 3g melamine and 50mg NiMAI-LDH were milled together to get well-mixed powder, which was then calcined in a tubular furnace under  $\text{N}_2$  atmosphere at  $650^\circ\text{C}$  for 3h. The calcined product was then stirred in  $3 \text{ mol L}^{-1} \text{ HCl}$  for 24h to remove the exposed nanoparticles and impurities. The sample was then washed by deionized water and dried.

**Characterization:** XRD patterns were collected by powder X-ray diffraction (XRD) on Bruker D8 diffractometer with  $\text{Cu-K}\alpha$  radiation ( $\lambda=1.5405 \text{ \AA}$ ). Scanning electron microscopy (SEM) images were obtained utilizing a Zeiss Supra55. High-resolution transmission electron microscopy (HRTEM) images were performed on a FEI Talos F200x. Ni and Cu K-edge X-ray absorption fine structure (XAFS) measurements were performed at the 1W1B beamline of the Beijing Synchrotron Radiation Facility. Raman spectroscopy was performed at a Jobin-Yvon LabRam HR800 microscope. XPS spectra was calibrated against C 1s at 284.8 eV. The gas and liquid products were analyzed using Gas chromatography-mass spectrometry (GC-MS, QP2020 equipped with Micropacked column) and NMR (AVANCE III HD 400), respectively.

**Electrochemical measurements:** The measurements were taken in a H-type cell connected to an electrochemical station (CHI660A). Pt plate was chosen as the counter

electrode and the Ag/AgCl electrode served as reference electrode. The data was converted to those against the reversible hydrogen electrode (RHE) before analysis. For the working electrode, a typical procedure is to disperse 5mg sample and 10  $\mu$ L Nafion solution in 1mL ethanol solution. Afterwards, 200  $\mu$ L mixture was taken and loaded on the carbon fiber paper with the size of 1\*2 cm<sup>2</sup> in an area of 1\*1 cm<sup>2</sup>. LSV test, CV test and the faradaic efficiency analysis were taken in 0.25M KHCO<sub>3</sub> after injection of CO<sub>2</sub> gas for 30 minutes, which remains at the flow rate of 20 mL/min during the entire catalytic period.

**Faradic efficiency calculation:** Faradic efficiency was calculated by the equation:

$$FE = \frac{n \times Z \times F}{Q} \times 100\%$$

n is the moles of the product; F is the Faradaic constant (96485.33289 C mol<sup>-1</sup>); Z: the number of transferred electrons (Z<sub>CO</sub>=Z<sub>H2</sub>= 2); Q is the total charge calculated during CO<sub>2</sub>RR.

$$n = \frac{P_0 \times v \times V}{R \times T}$$

P<sub>0</sub> is the standard atmospheric pressure (101.325 kPa); v is the gas flow rate (20 mL/min); V is the volume concentration of the calculated product in the outlet gas from the catalytic system; T is the reaction temperature (298 K) and R is the ideal gas constant (8.314 J mol<sup>-1</sup> K<sup>-1</sup>).

**CO<sub>2</sub> electrolysis in flow cells:** CO<sub>2</sub>RR was taken in a flow cell equipped with gas diffusion electrodes (GDE), where Ag/AgCl electrode served as reference electrode. The catalyst ink was prepared in the same way and loaded on the carbon fiber paper with the size of 1  $\times$  1 cm<sup>2</sup>. KOH was chosen as the catholyte and anolyte, which were cycled at a flow rate of 14 mL min<sup>-1</sup> by using a peristaltic pump.CO<sub>2</sub> gas flow was delivered into the gas chamber at 14 sccm and collected for GC analysis.

### Computational details

All spin-polarized DFT calculations were performed using the QUICKSTEP module in the CP2K package (version 2023.1)<sup>1</sup>. The exchange-correlation potential in the single-electron Kohn-Sham equation was described by generalized gradient

approximation (GGA) with the Perdew-Burke-Ernzerhof (PBE) functional<sup>2</sup>. Wavefunctions were expanded in molecularly optimized (MOLOPT) double  $\zeta$ -valence polarized basis set<sup>3</sup> with an auxiliary plane-wave basis set with a cutoff energy of 410 Ry. Core electrons were modeled by scalar relativistic norm-conserving Goedecker-Teter-Hutter (GTH) pseudopotentials<sup>4</sup> with 18, 11, 15, 16, 4, 5, 6, and 1 valence electrons for Ni, Cu, Mn, Fe, C, N, O, and H, respectively. Grimme's D3 method with Becke-Johnson (B-J) damping<sup>5, 6</sup> was added to study the impact of van der Waals interaction. The Monkhorst-Pack gamma centered  $3\times 3\times 1$  k point mesh was used for Brillouin zone sampling during geometry optimization process and self-consistent field (SCF) interaction was carried out with a conventional diagonalized method.

The density of state (DOS) was analyzed by Multiwfn package<sup>7</sup> with the formed molder file in single point calculation. The projected DOS (pDOS) was calculated with the C-Squared Population Analysis (SCPA) method<sup>8</sup> and the Gaussian function was selected to be the broadening function.

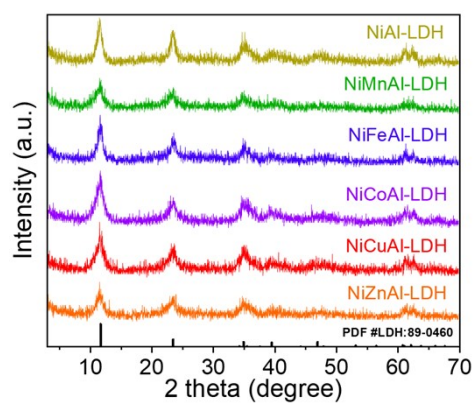

Figure S1. XRD patterns of NiAl-LDH.

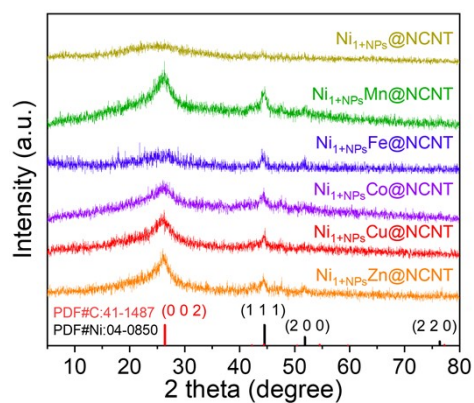

Figure S2. XRD patterns of Ni<sub>1+NPs</sub>M@NCNTs.

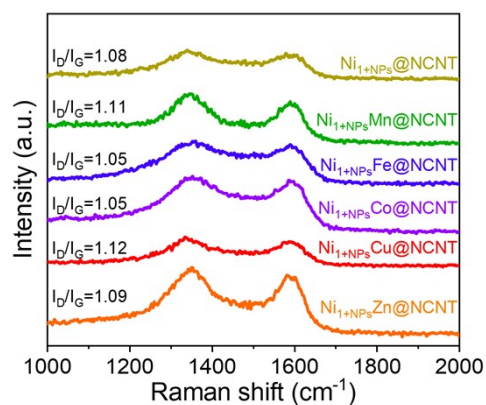

Figure S3. Raman spectra of Ni<sub>1+NPs</sub>M@NCNT.

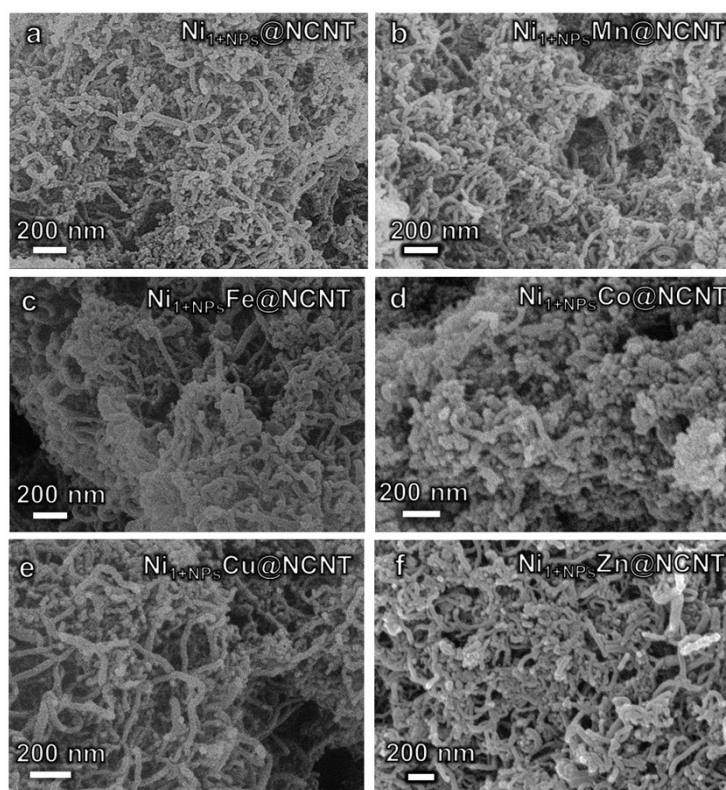

Figure S4. (a-f) SEM images of Ni<sub>1+NPs</sub>M@NCNT (M=Mn, Fe, Co, Ni, Cu, Zn).

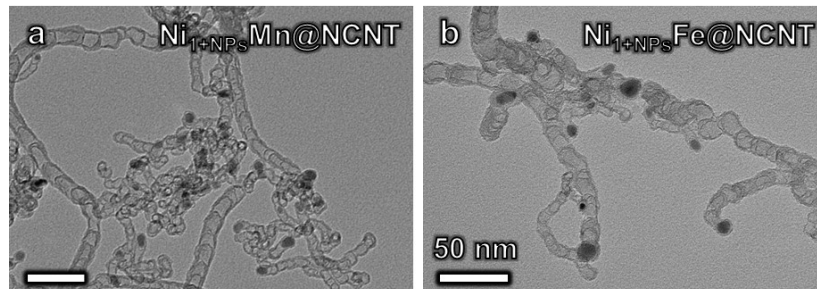

Figure S5. TEM images of (a) Ni<sub>1+NPs</sub>Mn@NCNT and (b) Ni<sub>1+NPs</sub>Fe@NCNT.



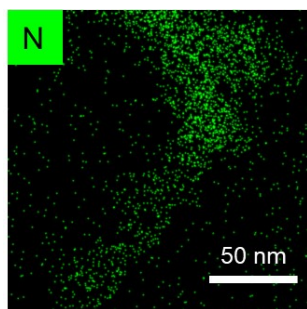

Figure S6. EDX elemental mapping image of N in the  $\text{Ni}_{1+\text{NP}_s}\text{Cu@NCNT}$ .

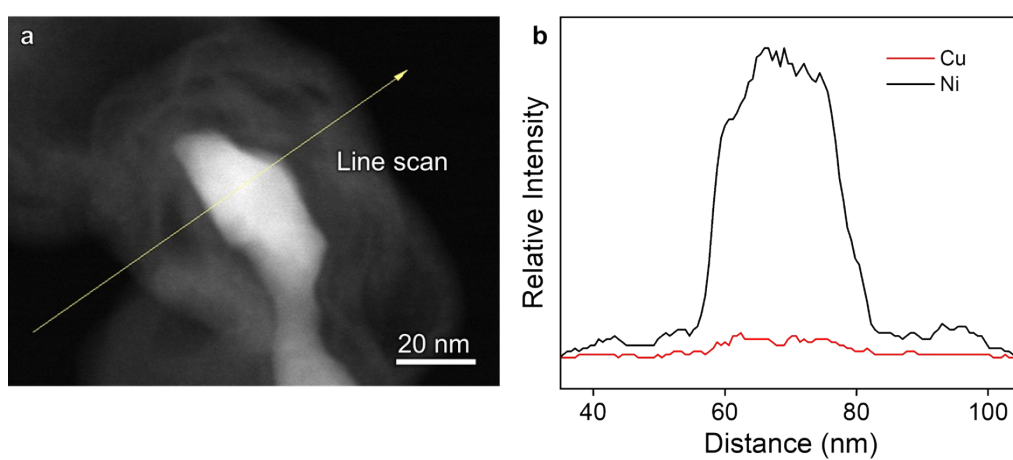

Figure S7. (a) STEM image of  $\text{Ni}_{1+\text{NP}_s}\text{Cu@NCNT}$  and (b) the corresponding STEM-EDX line scanning image.

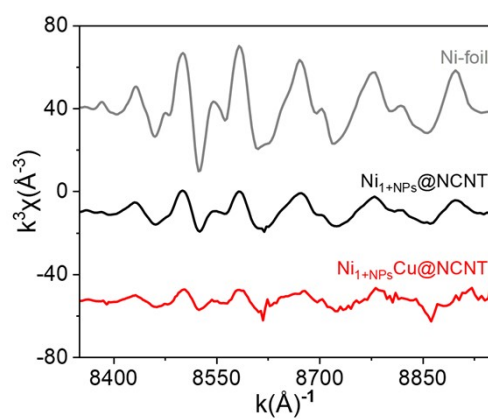

Figure S8. EXAFS in k space of  $\text{Ni}_{1+\text{NP}_5}\text{@NCNT}$ ,  $\text{Ni}_{1+\text{NP}_5}\text{Cu@NCNT}$  and Ni foil.

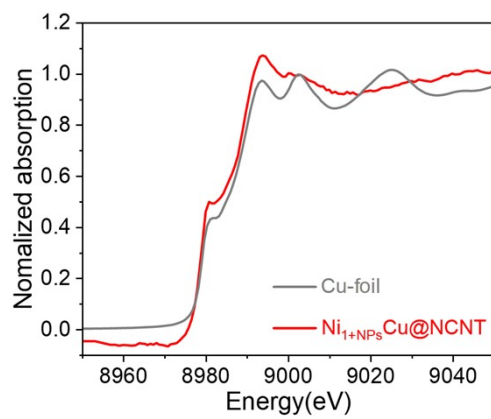

Figure S9. Cu K-edge XANES spectra of  $\text{Ni}_{1+\text{NP}_5}\text{Cu@NCNT}$  and Cu foil

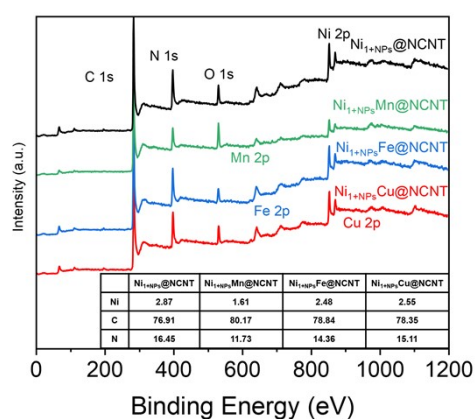

Figure S10. XPS of Ni<sub>1+NPs</sub>@NCNT, Ni<sub>1+NPs</sub>Mn@NCNT, Ni<sub>1+NPs</sub>Fe@NCNT and Ni<sub>1+NPs</sub>Cu@NCNT.

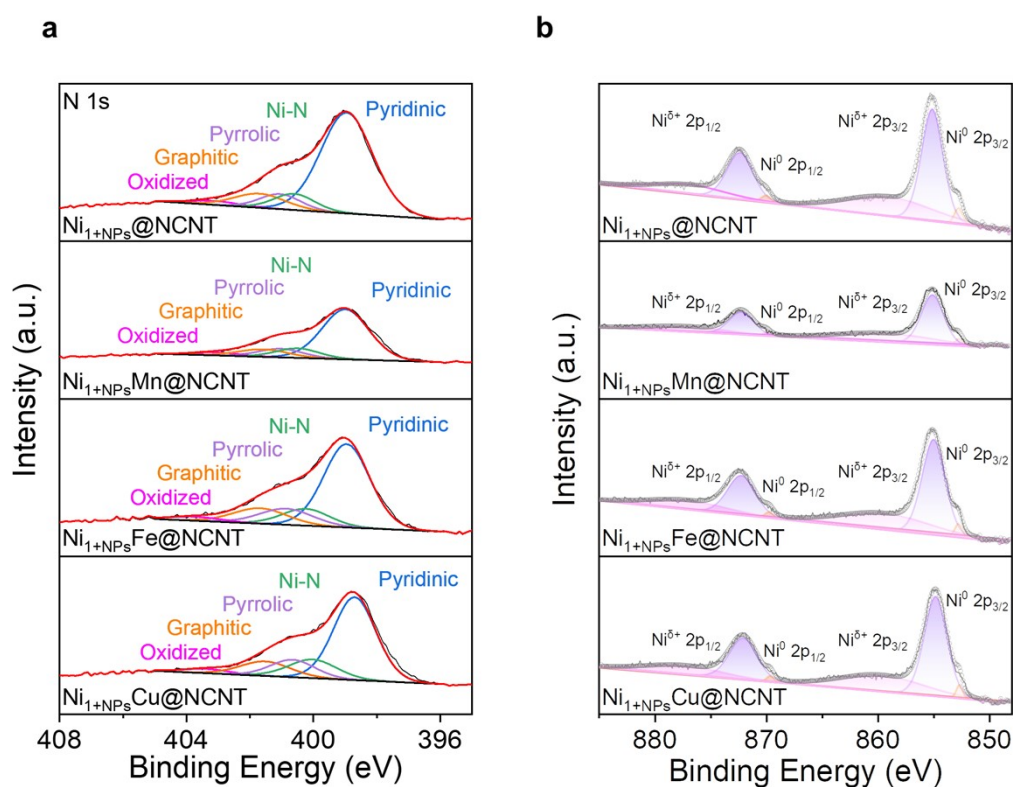

Figure S11. (a) N 1s and (b) Ni 2p XPS spectra of Ni<sub>1+NPs</sub>@NCNT, Ni<sub>1+NPs</sub>Mn@NCNT, Ni<sub>1+NPs</sub>Fe@NCNT and Ni<sub>1+NPs</sub>Cu@NCNT.

Table S1. EXAFS fitting results of  $\text{Ni}_{1+\text{NPs}}\text{Cu@NCNT}$ ,  $\text{Ni}_{1+\text{NPs}}\text{@NCNT}$  and Ni foil.

| Sample                                   | shell | C.N. | R (Å) | $\Delta\sigma^2$ ( $/10^{-3}\text{Å}^2$ ) | $\Delta E_0$ (eV) | R factors |
|------------------------------------------|-------|------|-------|-------------------------------------------|-------------------|-----------|
| Ni-foil                                  | Ni-Ni | 12   | 2.48  | 5.83                                      | -5.85             | 0.0010    |
| $\text{Ni}_{1+\text{NPs}}\text{@NCNT}$   | Ni-N  | 3.96 | 1.81  | 14.00                                     | -7.00             | 0.0027    |
|                                          | Ni-Ni | 2.15 | 2.49  | 5.06                                      | -4.77             |           |
| $\text{Ni}_{1+\text{NPs}}\text{Cu@NCNT}$ | Ni-N  | 3.91 | 1.81  | 19.00                                     | -5.00             | 0.0195    |
|                                          | Ni-Ni | 0.88 | 2.49  | 3.36                                      | -4.85             |           |

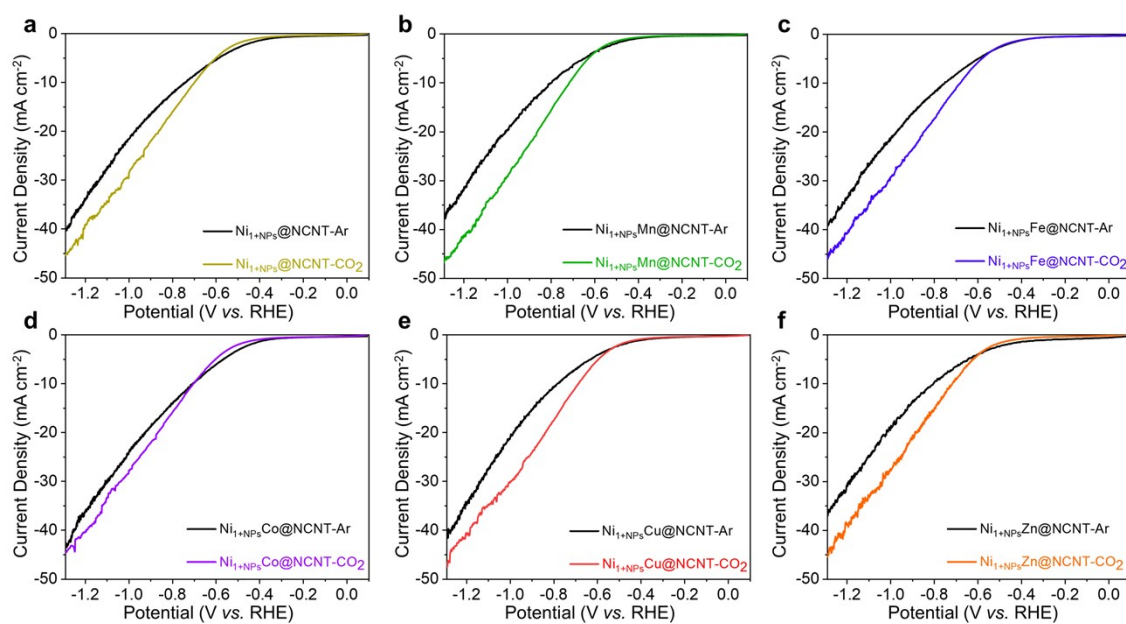

Figure S12. (a-f) LSV curves of  $\text{Ni}_{1+\text{NPs}}\text{M@NCNT}$  under Ar (black) and  $\text{CO}_2$  (colored) atmosphere.

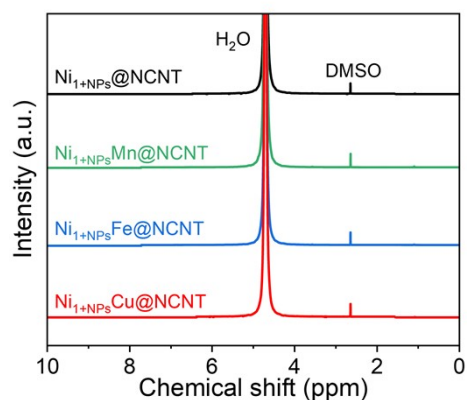

Figure S13. Characterization for the liquid product of  $\text{Ni}_{1+\text{NP}_5}\text{M@NCNT}$  after the full-potential- $\text{CO}_2\text{RR}$  period by  $^1\text{H}$  nuclear magnetic resonance spectroscopy.

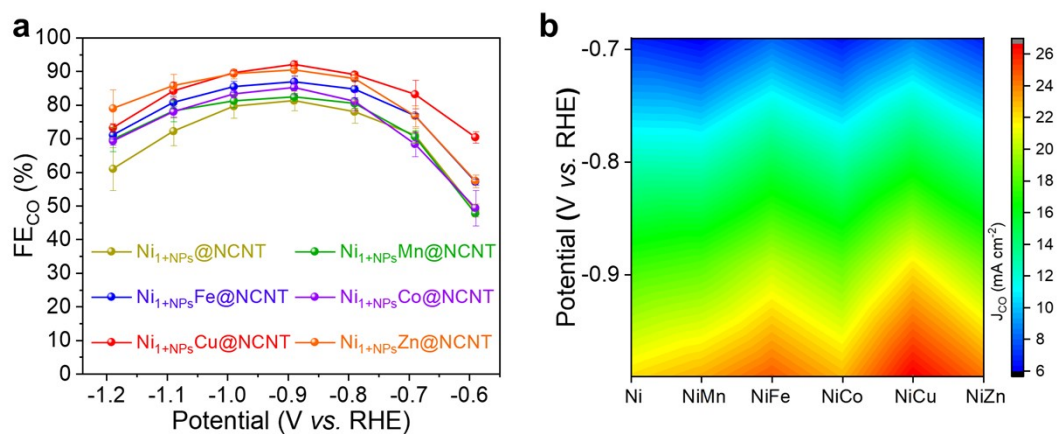

Figure S14.  $\text{CO}_2\text{RR}$  performance of  $\text{Ni}_{1+\text{NP}_5}\text{M@NCNT}$ . (a)  $\text{FE}_{\text{CO}}$  of  $\text{Ni}_{1+\text{NP}_5}\text{M@NCNT}$  ( $\text{M}=\text{Mn}, \text{Fe}, \text{Co}, \text{Ni}, \text{Cu}, \text{Zn}$ ); (b) contour plots of  $J_{\text{CO}}$  under different potential.

Table S2.  $FE_{CO}$  of  $Ni_{1+NPs}M@NCNT$  under different potentials.

| <b>Potential (V vs. RHE)</b> | <b><math>Ni_{1+NPs}@NCNT</math></b> | <b><math>Ni_{1+NPs}Mn@NCNT</math></b> | <b><math>Ni_{1+NPs}Fe@NCNT</math></b> | <b><math>Ni_{1+NPs}Co@NCNT</math></b> | <b><math>Ni_{1+NPs}Cu@NCNT</math></b> | <b><math>Ni_{1+NPs}Zn@NCNT</math></b> |
|------------------------------|-------------------------------------|---------------------------------------|---------------------------------------|---------------------------------------|---------------------------------------|---------------------------------------|
| -0.59                        | 48.64                               | 47.64                                 | 57.15                                 | 49.34                                 | 70.37                                 | 57.40                                 |
| -0.69                        | 70.99                               | 70.51                                 | 76.81                                 | 68.34                                 | 83.15                                 | 76.73                                 |
| -0.79                        | 77.96                               | 80.44                                 | 84.70                                 | 81.07                                 | 89.0                                  | 87.85                                 |
| -0.89                        | 81.26                               | 82.37                                 | 86.86                                 | 85.18                                 | 92.06                                 | 90.42                                 |
| -0.99                        | 79.60                               | 81.20                                 | 85.44                                 | 83.25                                 | 89.56                                 | 89.27                                 |
| -1.09                        | 72.16                               | 78.17                                 | 80.74                                 | 77.96                                 | 84.15                                 | 85.73                                 |
| -1.19                        | 60.96                               | 69.72                                 | 71.04                                 | 69.23                                 | 73.18                                 | 78.96                                 |

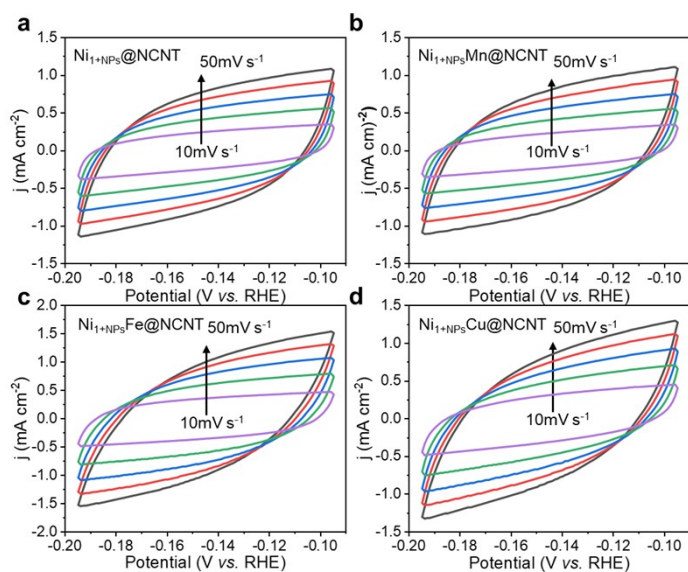

Figure S15. Typical cyclic voltammograms for (a)  $\text{Ni}_{1+\text{NPs}}\text{@NCNT}$ , (b)  $\text{Ni}_{1+\text{NPs}}\text{Mn@NCNT}$ , (c)  $\text{Ni}_{1+\text{NPs}}\text{Fe@NCNT}$  and (d)  $\text{Ni}_{1+\text{NPs}}\text{Cu@NCNT}$  under different scan rates.

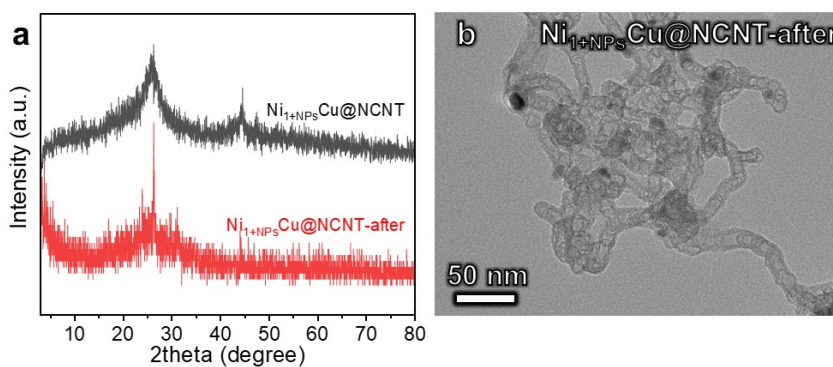

Figure S16. (a) XRD patterns of  $\text{Ni}_{1+\text{NPs}}\text{Cu@NCNT}$  before (black) and after (red)  $\text{CO}_2\text{RR}$ ; (b) TEM image of the  $\text{Ni}_{1+\text{NPs}}\text{Cu@NCNT}$  after  $\text{CO}_2\text{RR}$ .

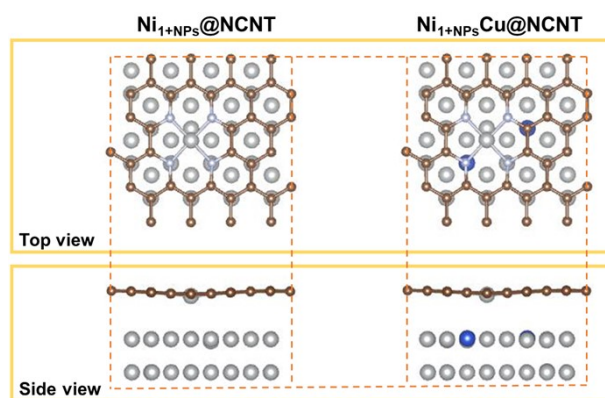

Figure S17. DFT models for Ni<sub>1+NP</sub>@NCNT and Ni<sub>1+NP</sub>@Cu@NCNT.

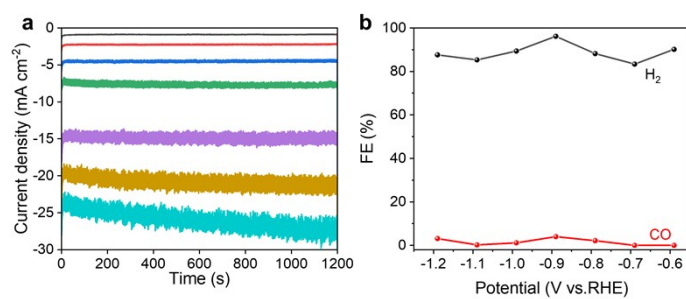

Figure S18. CO<sub>2</sub>RR performance of Ni<sub>1+NP</sub>@NCNT. (a) current density and (b) FE<sub>CO</sub> and FE<sub>H<sub>2</sub></sub> under different potentials.



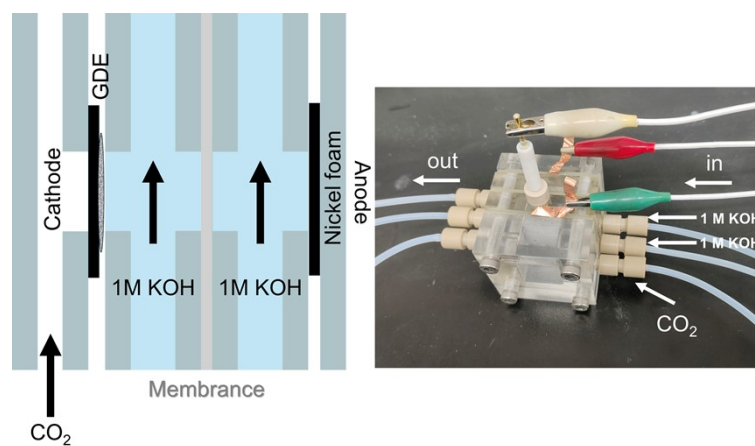

Figure S19. (a) Schematic illustration and (b) photograph of the flow cells.

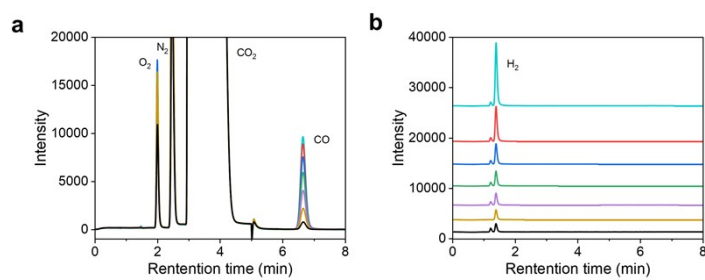

Figure S20. (a) TCD1 Chromatogram of CO; and (b) TCD2 Chromatogram of H<sub>2</sub>.

Table S3. Comparison of CO<sub>2</sub>RR performance displayed by our catalyst and other reported works.

| Material                                  | Electrolyte              | cell      | FE <sub>CO</sub> (%) | Potential (V vs. RHE)      | Current density (mA cm <sup>-2</sup> ) | Ref.      |
|-------------------------------------------|--------------------------|-----------|----------------------|----------------------------|----------------------------------------|-----------|
| ACP/S-N-Ni                                | 0.5 M KHCO <sub>3</sub>  | H-type    | 91                   | -0.77                      | 4.1                                    | 9         |
| Ni SAs/N-C                                | 0.5 M KHCO <sub>3</sub>  | H-type    | 71.9                 | -0.9                       | 10.48                                  | 10        |
| NiSA-N-CNTs                               | 0.5 M KHCO <sub>3</sub>  | H-type    | 91.3                 | -0.7                       | 25.74                                  | 11        |
| Ni-N-C                                    | 0.1 M KHCO <sub>3</sub>  | H-type    | 97                   | -0.75                      | 7.73                                   | 12        |
| Ni-N <sub>3</sub> -C                      | 0.5 M KHCO <sub>3</sub>  | H-type    | 95.6                 | -0.65                      | 6.95                                   | 13        |
| NiN-GS                                    | 0.1 M KHCO <sub>3</sub>  | H-type    | 93.2                 | at 0.7 V<br>overpotential  | 4.16                                   | 14        |
|                                           | 1M KHCO <sub>3</sub>     | Flow cell | 91.9                 | at 0.66 V<br>overpotential | 10.68                                  |           |
| NiPc-COF                                  | 0.5 M KHCO <sub>3</sub>  | H-type    | 99.1                 | -0.9 V                     | -                                      | 15        |
|                                           | 1 M KOH                  | Flow cell | 94.4                 | -0.5 V                     | 54                                     |           |
| Ni(NC)-1                                  | 0.5 M KHCO <sub>3</sub>  | H-type    | 99                   | -0.75, -0.80               | -                                      | 16        |
|                                           | 1 M KOH                  | Flow cell | 99                   | -1.82                      | 160                                    |           |
| Ni <sup>I</sup> -NCNT @Ni <sub>3</sub> Cu | 0.5 M KHCO <sub>3</sub>  | H-type    | 97                   | -0.73                      | 32.87                                  | 17        |
| Ni <sup>I</sup> +NP <sub>3</sub> Cu @NCNT | 0.25 M KHCO <sub>3</sub> | H-type    | 92                   | -0.89                      | 23.69                                  | This work |
|                                           | 1 M KOH                  | Flow cell | 96.92                | -0.78                      | 171.25                                 |           |

## References

- 1 T.D. Kühne, M. Iannuzzi, M.D. Ben, V.V. Rybkin, P. Seewald, F. Stein, T. Laino, R.Z. Khaliullin, O. Schütt, F. Schiffmann, D. Golze, J. Wilhelm, S. Chulkov, M.H. Bani-Hashemian, V. Weber, U. Borštnik, M. TAILLEFUMIER, A.S. Jakobovits, A. Lazzaro, H. Pabst, T. Müller, R. Schade, M. Guidon, S. Andermatt, N. Holmberg, G.K. Schenter, A. Hehn, A. Bussy, F. Belleflamme, G. Tabacchi, A. Glöb, M. Lass, I. Bethune, C.J. Mundy, C. Plessl, M. Watkins, J. VandeVondele, M. Krack, J. Hutter, CP2K: An electronic structure and molecular dynamics software package - Quickstep: Efficient and accurate electronic structure calculations, *J. Chem. Phys.*, 2020, **152**, 194103.
- 2 J.P. Perdew, K. Burke, M. Ernzerhof, Generalized Gradient Approximation Made Simple, *Phys. Rev. Lett.*, 1996, **77**, 3865.
- 3 J. VandeVondele, J. Hutter, Gaussian basis sets for accurate calculations on molecular systems in gas and condensed phases, *J. Chem. Phys.*, 2007, **127**, 114105.
- 4 C. Hartwigsen, S. Goedecker, J. Hutter, Relativistic separable dual-space Gaussian pseudopotentials from H to Rn, *Phys. Rev. B*, 1998, **56**, 3641.
- 5 S. Grimme, J. Antony, S. Ehrlich, H. Krieg, A consistent and accurate ab initio parametrization of density functional dispersion correction (DFT-D) for the 94 elements H-Pu, *J. Chem. Phys.*, 2010, **132**, 154104.
- 6 S. Grimme, S. Ehrlich, L. Goerigk, Effect of the damping function in dispersion corrected density functional theory, *J. Comput. Chem.*, 2011, **32**, 1456.
- 7 T. Lu, F. Chen, Multiwfn: a multifunctional wavefunction analyzer, *J. Comput. Chem.*, 2012, **33**, 580.
- 8 P. Ros, A.V.D. Avoird, G.C.A. Schuit, Molecular Orbital Calculations on Copper Chloride Complexes, *Coord. Chem. Rev.*, 1967, **2**, 77.
- 9 S. Li, M. Ceccato, X. Lu, S. Frank, N. Lock, A. Roldan, X.-M. Hu, T. Skrydstrup, K. Daasbjerg, Incorporation of nickel single atoms into carbon paper as self-standing electrocatalyst for CO<sub>2</sub> reduction, *J. Mater. Chem. A*, 2021, **9**(3), 1583-1592.
- 10 C. Zhao, X. Dai, T. Yao, W. Chen, X. Wang, J. Wang, J. Yang, S. Wei, Y. Wu, Y. Li, Ionic Exchange of Metal-Organic Frameworks to Access Single Nickel Sites for Efficient Electroreduction of CO<sub>2</sub>, *J. Am. Chem. Soc.*, 2017, **139**(24), 8078-8081.
- 11 Y. Cheng, S. Zhao, B. Johannessen, J.P. Veder, M. Saunders, M.R. Rowles, M. Cheng, C. Liu, M.F. Chisholm, R. De Marco, H.M. Cheng, S.Z. Yang, S.P. Jiang, Atomically Dispersed Transition Metals on Carbon Nanotubes with Ultrahigh Loading for Selective Electrochemical Carbon Dioxide Reduction, *Adv. Mater.*, 2018, **30**(13), 1706287.
- 12 F. Pan, H. Zhang, Z. Liu, D. Cullen, K. Liu, K. More, G. Wu, G. Wang, Y. Li, Atomic-level active sites of efficient imidazolate framework-derived nickel catalysts for CO<sub>2</sub> reduction, *J. Mater. Chem. A*, 2019, **7**(46), 26231-26237.
- 13 Y. Zhang, L. Jiao, W. Yang, C. Xie, H.L. Jiang, Rational Fabrication of Low-Coordinate Single-Atom Ni Electrocatalysts by MOFs for Highly Selective CO<sub>2</sub> Reduction, *Angew. Chem. Int. Ed.*, 2021, **60**(14), 7607-7611.
- 14 K. Jiang, S. Siahrostami, A.J. Akey, Y. Li, Z. Lu, J. Lattimer, Y. Hu, C. Stokes, M. Gangishetty, G. Chen, Y. Zhou, W. Hill, W.-B. Cai, D. Bell, K. Chan, J.K. Nørskov, Y. Cui, H. Wang, Transition-Metal Single Atoms in a Graphene Shell as Active Centers for Highly Efficient Artificial Photosynthesis, *Chem*, 2017, **3**(6), 950-960.

- 15 M.D. Zhang, D.H. Si, J.D. Yi, S.S. Zhao, Y.B. Huang, R. Cao, Conductive Phthalocyanine-Based Covalent Organic Framework for Highly Efficient Electroreduction of Carbon Dioxide, *Small*, 2020, **16**(52), 2005254.
- 16 C.F. Wen, F. Mao, Y. Liu, X.Y. Zhang, H.Q. Fu, L.R. Zheng, P.F. Liu, H.G. Yang, Nitrogen-Stabilized Low-Valent Ni Motifs for Efficient CO<sub>2</sub> Electrocatalysis, *ACS Catal.*, 2019, **10**(2), 1086-1093.
- 17 T. Zhang, X. Han, H. Yang, A. Han, E. Hu, Y. Li, X.Q. Yang, L. Wang, J. Liu, B. Liu, Atomically Dispersed Nickel(I) on an Alloy-Encapsulated Nitrogen-Doped Carbon Nanotube Array for High-Performance Electrochemical CO<sub>2</sub> Reduction Reaction, *Angew. Chem. Int. Ed.*, 2020, **59**(29), 12055-12061.
